# Supplementary material for: PERGA: A Paired-End Read Guided De Novo Assembler for Extending Contigs Using SVM and Look Ahead Approach
Source: PubMed Central journal article supplement (PMC4252104; doi:10.1371/journal.pone.0114253), 2014-12-02

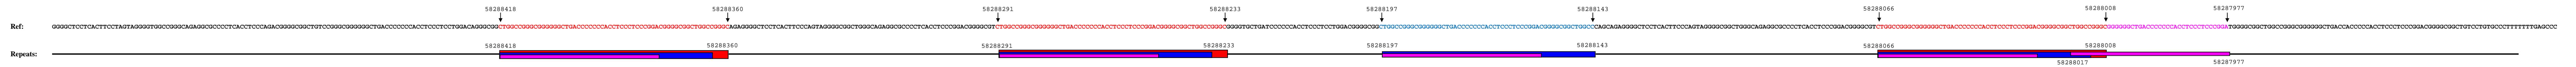

1) Resolve the branch caused by repeat A at position 58,288,360

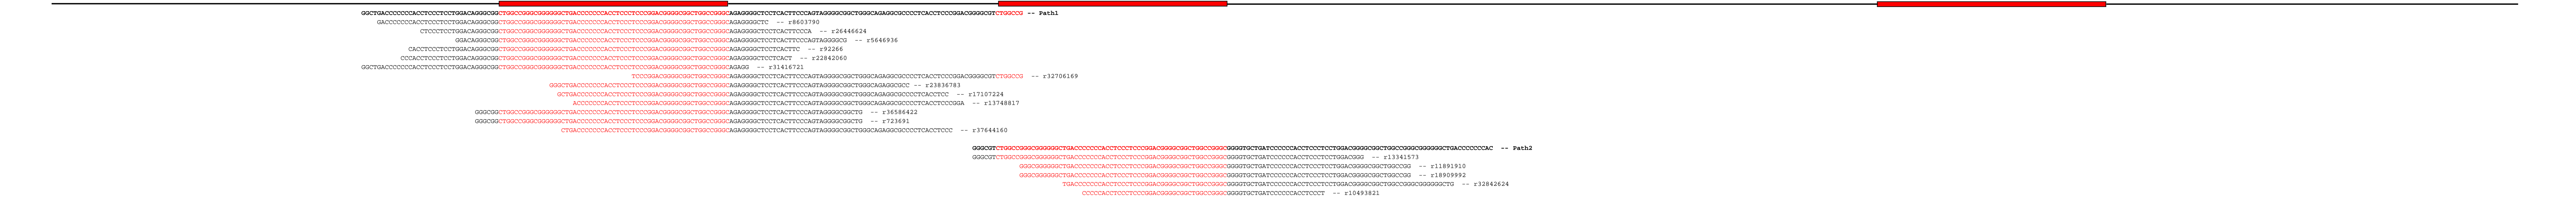

2) Resolve the branch caused by repeat B at position 58,288,237

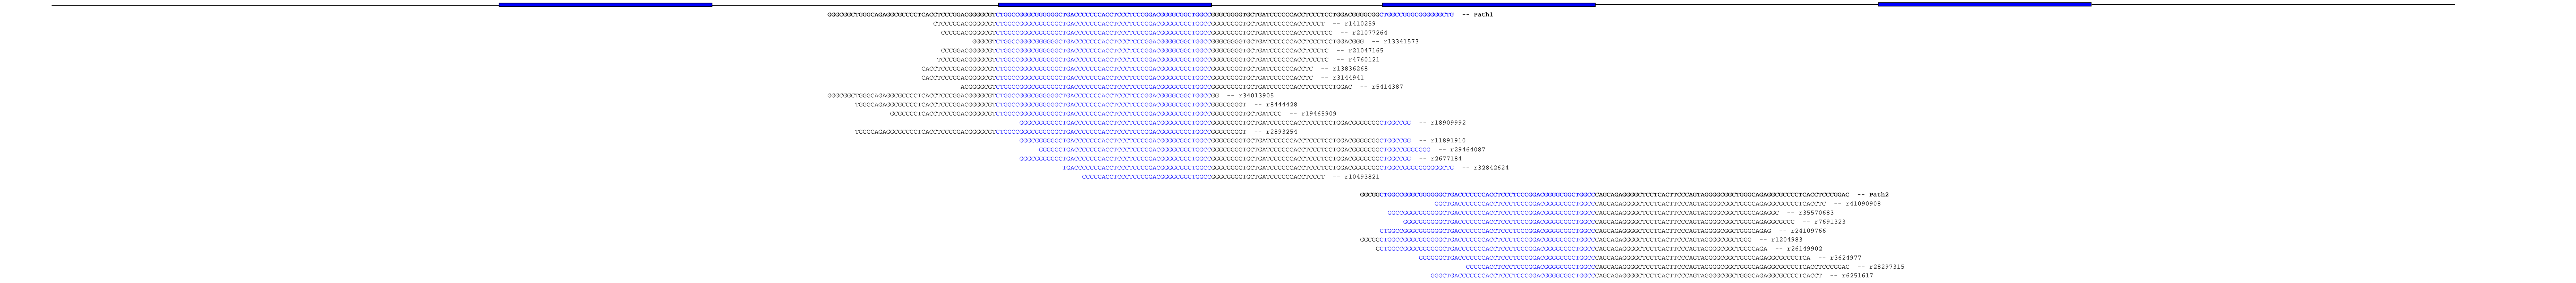

3.1) Resolve the branch caused by repeat C at position 58,288,157

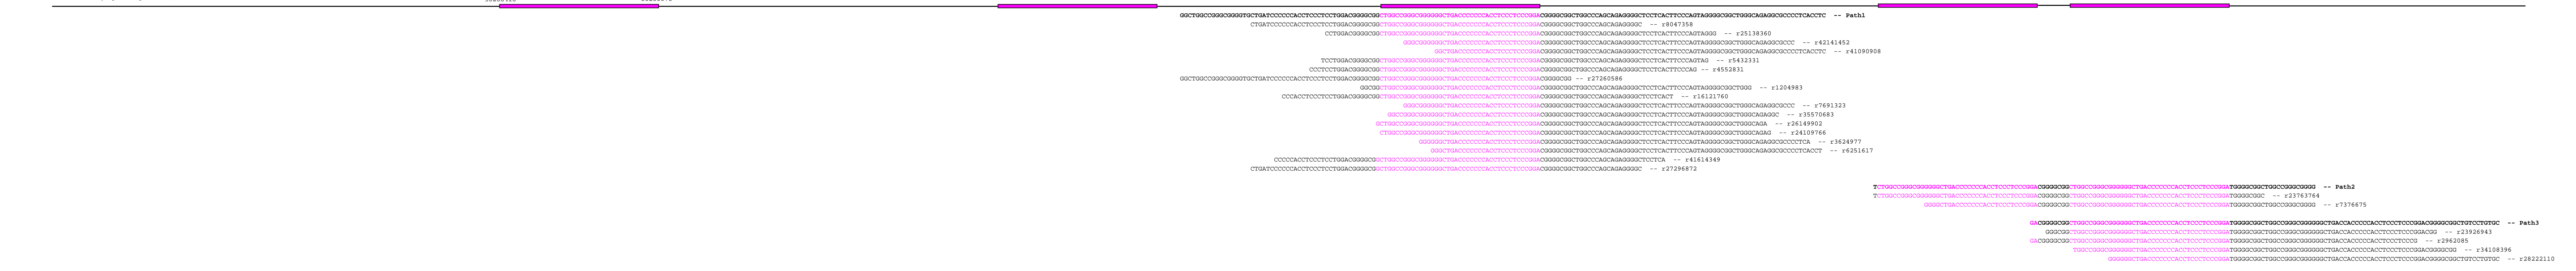

3.2) Resolve the branch caused by repeat C at position 58,288,026

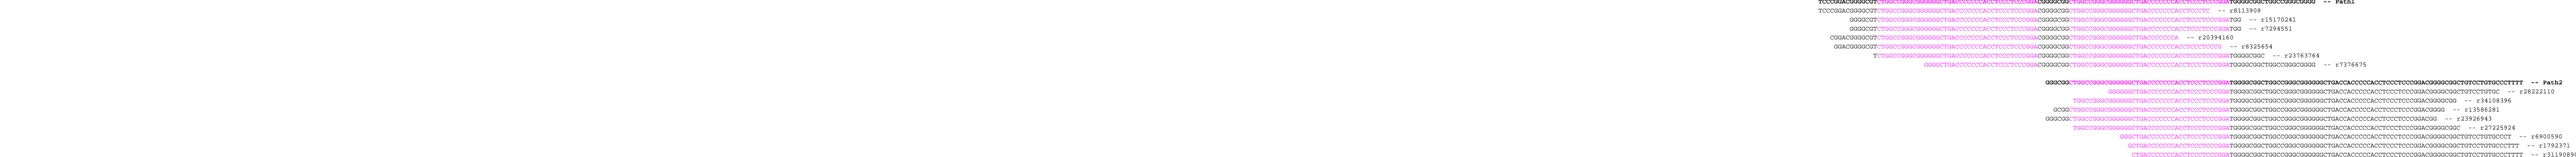

Supplement: pone.0114253.s002.pdf [file pone.0114253.s002.pdf]
